# Supplementary material for: Infection control and risk factors for acquisition of carbapenemase-producing enterobacteriaceae. A 5 year (2011–2016) case-control study
Source: Antimicrob Resist Infect Control. 2020 Jan 17;9:18. doi: 10.1186/s13756-019-0668-2 (PMC6969403; doi:10.1186/s13756-019-0668-2)
Supplement: Supplementary file 1 — Additional file 1. Distribution of antimicrobials administrated to the CPE patients. [file 13756_2019_668_MOESM1_ESM.xlsx]

## Sheet: Supplement 1
Title: Distribution of antimicrobials administrated to the CPE patients
Antimicrobials	No.	Percentage (%)
Carbapenems	12	28.5714
Glycopeptides	5	11.9048
Penicillin and beta-lactams inhibitors	7	16.6667
Fosfomycin	4	9.52381
Colistin	4	9.52381
Cephalosporins 3rd Generation	3	7.14286
Monobactams	2	4.7619
Oxazolidinones	2	4.7619
Fluorquinolones	2	4.7619
Aminoglycosides	1	2.38095
Total	42	100.0
